# Supplementary material for: Magnetic base catalysts for the chemical fixation of carbon dioxide to quinazoline-2,4(1H,3H)-diones
Source: Royal Society of Chemistry journal article supplement (doi:10.1039/c4ra03659j), 2014-01-01

**Electronic Supplementary Information for**  
**Magnetic base catalysts for chemical fixation of carbon dioxide to**  
**quinazoline-2,4(1H,3H)-diones**

Ya-Nan Zhao, Bing Yu, Zhen-Zhen Yang, and Liang-Nian He\*

Address: State Key Laboratory and Institute of Elemento-Organic Chemistry, Nankai  
University, Tianjin 300071, People's Republic of China

Email: heln@nankai.edu.cn

**Table of contents**

|                                                                                                     |          |
|-----------------------------------------------------------------------------------------------------|----------|
| <b>1. Characterization of quinaline-2,4(1H, 3H)-dinones .....</b>                                   | <b>1</b> |
| <b>2. The <sup>1</sup>H and <sup>13</sup>C NMR Charts for quinalidine-2,4(1H, 3H)-dinones .....</b> | <b>3</b> |

**1. Characterization of quinaline-2,4(1H, 3H)-dinones**

1). Quinaline-2,4(1H, 3H)-dinones

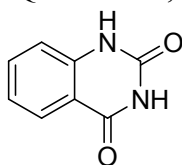

White solid; m.p. > 300 °C; <sup>1</sup>H NMR (d<sup>6</sup>-DMSO, 400 MHz) δ 11.29(s, 1H), 11.14(s, 1H), 7.88(d, <sup>3</sup>J = 8 Hz, 1H), 7.63(t, <sup>3</sup>J = 8 Hz, 1H), 7.17(t, <sup>3</sup>J = 8 Hz, 2H); <sup>13</sup>C NMR (d<sup>6</sup>-DMSO, 100.6 MHz) δ 162.8, 150.3, 140.8, 134.9, 126.9, 122.3, 115.3, 114.3; ESI-MS calcd for C<sub>8</sub>H<sub>6</sub>N<sub>2</sub>O<sub>2</sub> 162.15, found 161.17(M-H)<sup>-</sup>.

2). 6,7-dimethylquinaline-2,4(1H, 3H)-dinones

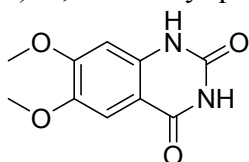

Light yellow solid; m.p. > 300 °C; <sup>1</sup>H NMR (d<sup>6</sup>-DMSO, 400 MHz) δ 11.12(s, 1 H), 10.94(s, 1 H), 7.24(s, 1 H), 6.68(s, 1 H), 3.79(s, 6 H); <sup>13</sup>C NMR (d<sup>6</sup>-DMSO, 100.6 MHz) δ 162.4, 154.8, 150.35, 145.0, 136.5, 107.1, 106.1, 97.7, 55.7, 55.6. ESI-MS calcd for C<sub>10</sub>H<sub>10</sub>N<sub>2</sub>O<sub>4</sub> 222.2, found 221.07(M-H)<sup>-</sup>.

3). 7- Chloroquinaline-2,4(1H, 3H)-dinones

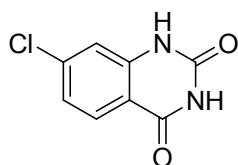

Light yellow solid; m. p. > 300 °C;  $^1\text{H}$  NMR ( $\text{d}^6$ -DMSO, 400 MHz)  $\delta$  11.46(s, 1 H), 11.32(s, 1 H), 7.80(s, 1 H), 7.65(dd,  $^3J = 8.8$  Hz, 1 H), 7.18(d,  $^3J = 8.4$  Hz, 1 H);  $^{13}\text{C}$  NMR ( $\text{d}^6$ -DMSO, 100.6 MHz)  $\delta$  162.0, 150.1, 139.5, 134.9, 126.5, 125.9, 117.6, 115.6; ESI-MS calcd for  $\text{C}_8\text{H}_5\text{ClN}_2\text{O}_2$  196.59, found 195.21(M-H) $^-$

4) 6-Chloroquinoline-2,4(*1H*, *3H*)-dinones

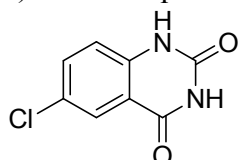

White solid; m. p. > 300 °C;  $^1\text{H}$  NMR ( $\text{d}^6$ -DMSO, 400 MHz)  $\delta$  11.42 (s, 1 H), 11.27 (s, 1 H), 7.87(d,  $^3J = 8.4$  Hz, 1 H), 7.21(dd,  $^3J = 8.4$  Hz, 1 H), 7.17(s, 1 H);  $^{13}\text{C}$  NMR ( $\text{d}^6$ -DMSO, 100.6 MHz)  $\delta$  161.7, 150.1, 138.7, 132.6, 124.0, 127.8, 119.6, 117.8. ESI-MS calcd for  $\text{C}_8\text{H}_5\text{ClN}_2\text{O}_2$  196.59, found 195.17 (M-H) $^-$ .

5) 6-Bromoquinoline-2,4(*1H*, *3H*)-dinones

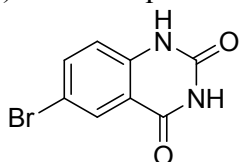

White solid; m. p. > 300 °C;  $^1\text{H}$  NMR ( $\text{d}^6$ -DMSO, 400 MHz)  $\delta$  11.46(s, 1 H), 11.30(s, 1 H), 7.93(s, 1 H), 7.80(dd,  $^3J = 8.8$  Hz, 1 H), 7.11(d,  $^3J = 8.8$  Hz, 1 H);  $^{13}\text{C}$  NMR ( $\text{d}^6$ -DMSO, 100.6 MHz)  $\delta$  161.8, 150.1, 140.1, 137.6, 128.9, 117.80, 116.2, 113.8; HRMS: calcd for  $\text{C}_8\text{H}_5\text{BrN}_2\text{O}_2$  (M-H) $^-$  238.9462, found 238.9455.

6) 6-Fluoroquinoline-2,4(*1H*, *3H*)-dinones

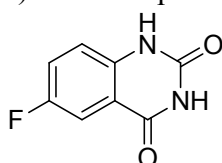

White solid; m. p. > 300 °C;  $^1\text{H}$  NMR ( $\text{d}^6$ -DMSO, 400 MHz)  $\delta$  11.32(s, 2 H), 7.60-7.52(m, 2 H), 7.21-7.18(m, 1 H);  $^{13}\text{C}$  NMR ( $\text{d}^6$ -DMSO, 100.6 MHz)  $\delta$  162.2, (158.5, 156.1), 150.1, 137.6, (123.1, 122.8), (117.7, 117.5), (115.5, 115.4), (112.1, 111.9); HRMS calcd for  $\text{C}_8\text{H}_5\text{FN}_2\text{O}_2$  (M-H) $^-$  179.0262, found 179.0255.

### 3. The $^1\text{H}$ and $^{13}\text{C}$ NMR Charts for quinaldine-2,4(1*H*, 3*H*)-dinones

#### Quinaldine-2,4(1*H*, 3*H*)-dinones

11-18  
PROTON

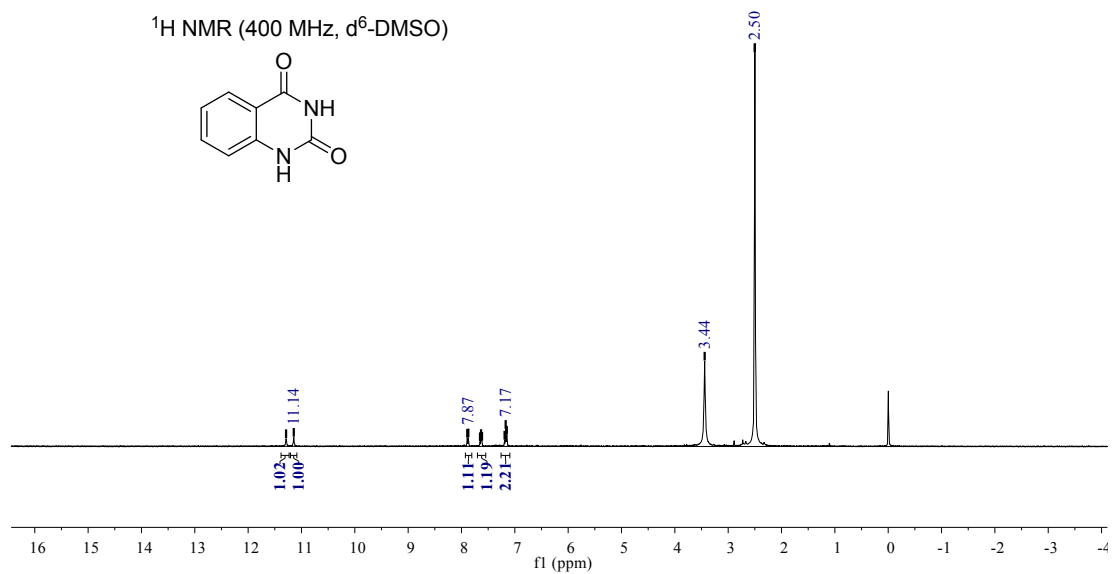

zyn11-30c  
C13CPD

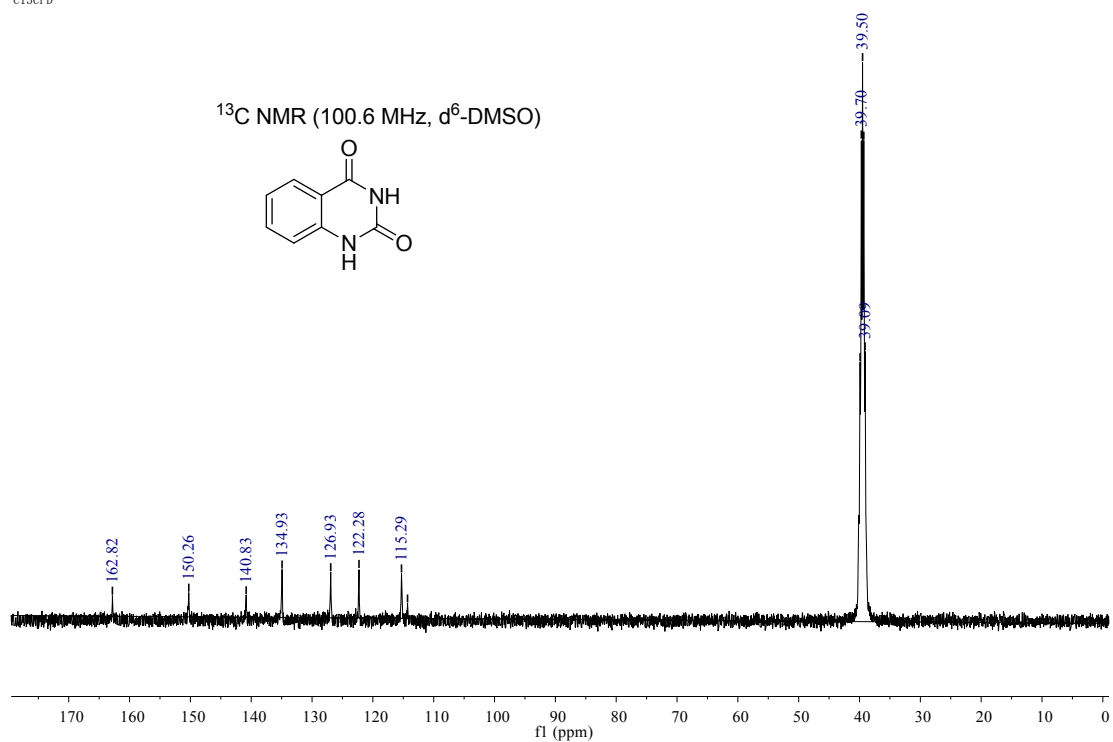



# 7- Chloroquinoline-2,4(1H, 3H)-diones

<sup>1</sup>H  
PROTON

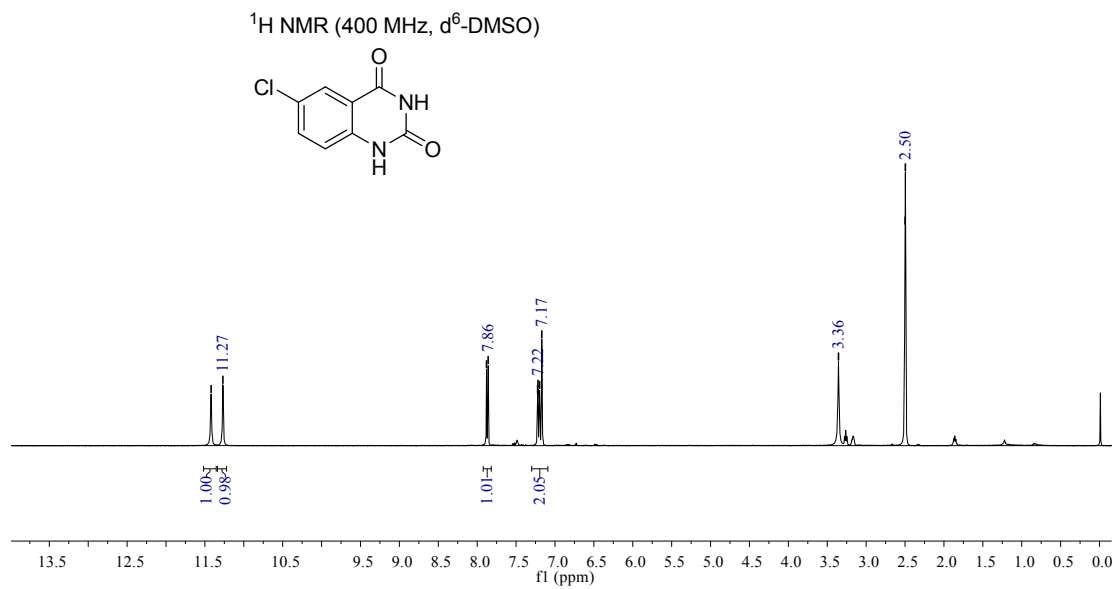

zyn-Cl  
Cl3CPD

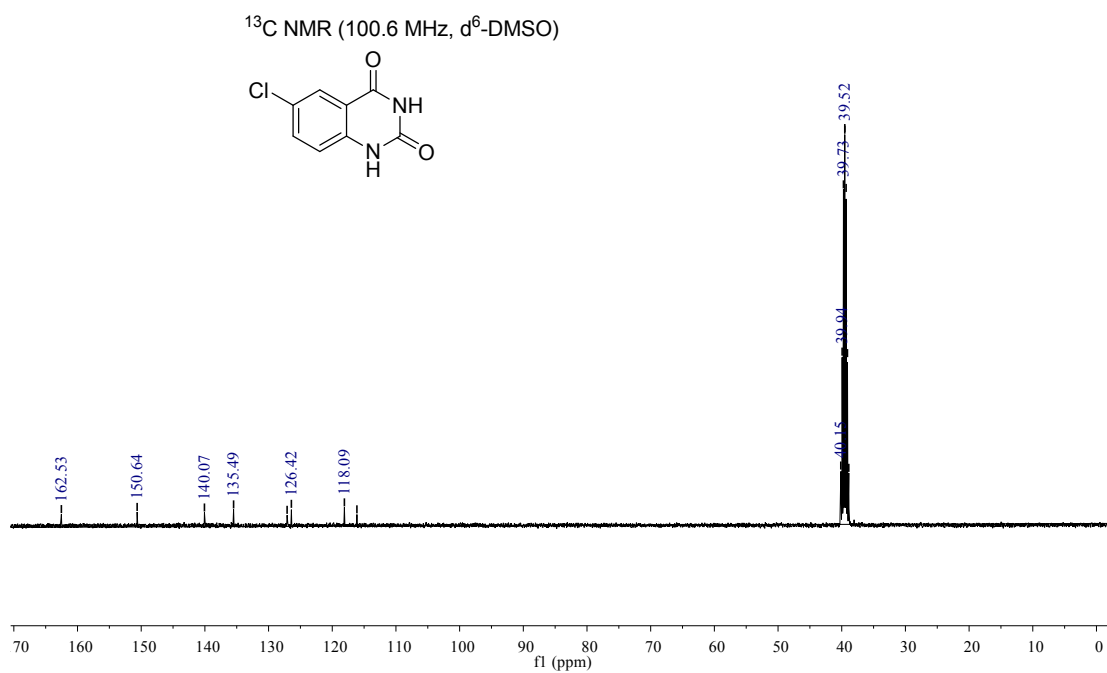

# 6-Chloroquinoline-2,4(1H, 3H)-diones

<sup>1</sup>H  
PROTON

<sup>1</sup>H NMR (400 MHz, d<sup>6</sup>-DMSO)

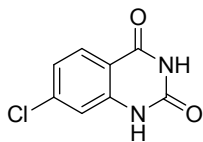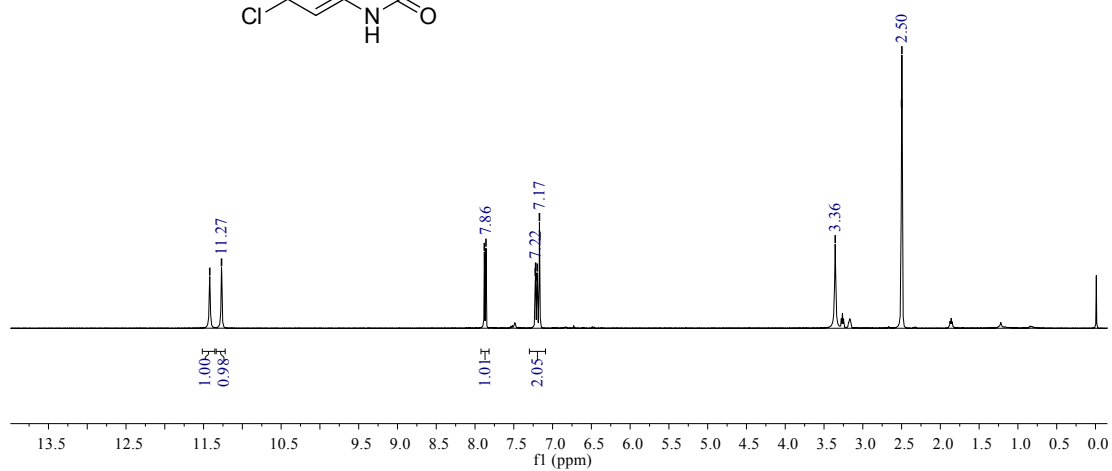

zyn-Cl  
C13CPD

<sup>13</sup>C NMR (100.6 MHz, d<sup>6</sup>-DMSO)

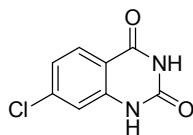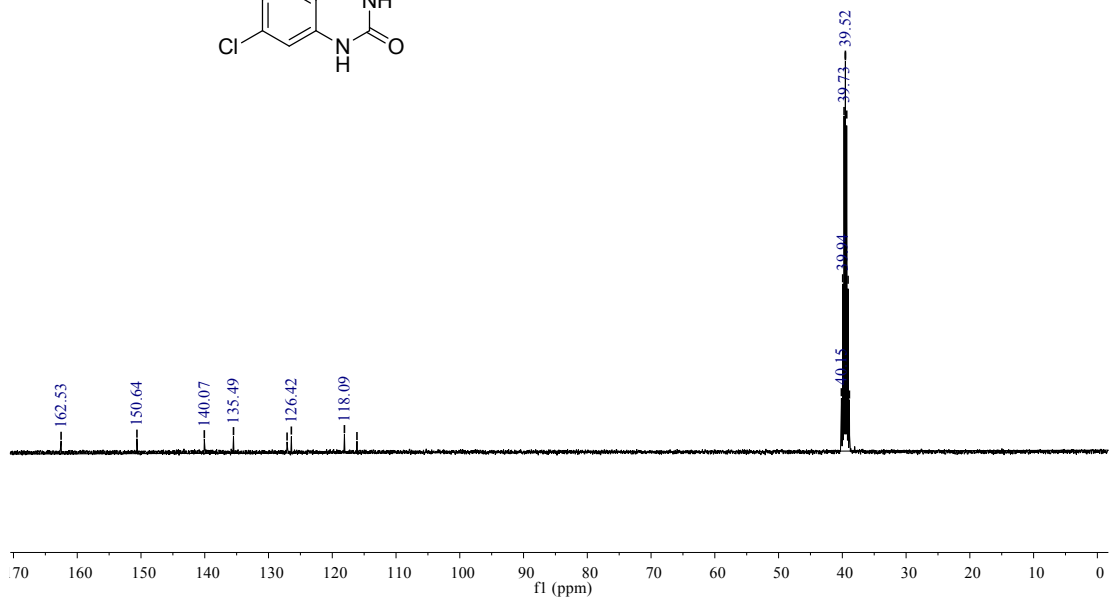

# 6-Bromoquinoline-2,4(1H, 3H)-diones

1  
PROTON

<sup>1</sup>H NMR (400 MHz, d<sup>6</sup>-DMSO)

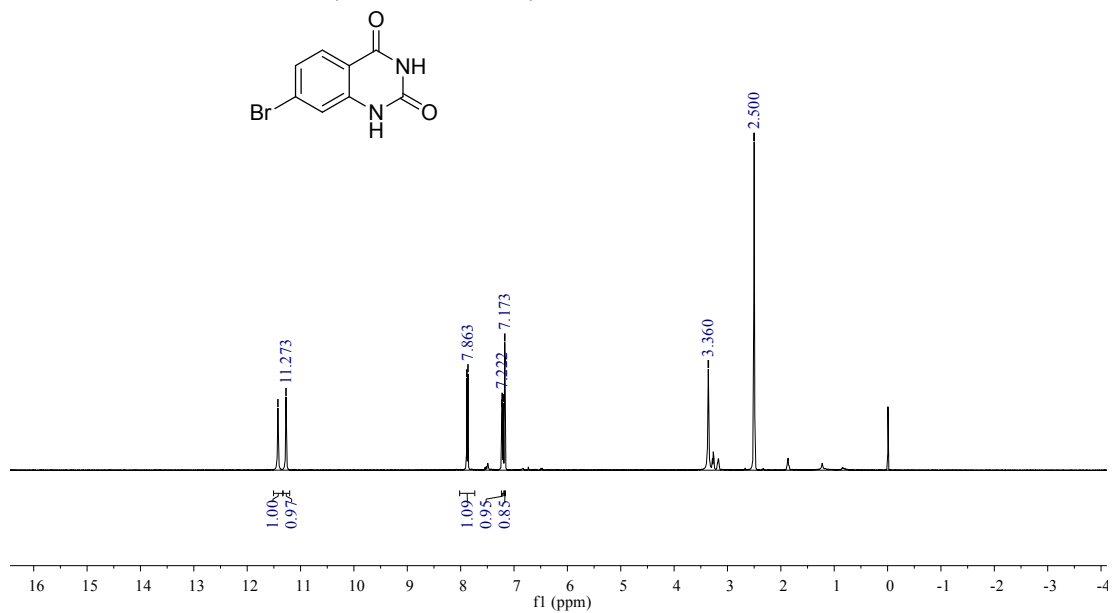

4-17-Br  
C13CPD

<sup>1</sup>H NMR (400 MHz, d<sup>6</sup>-DMSO)

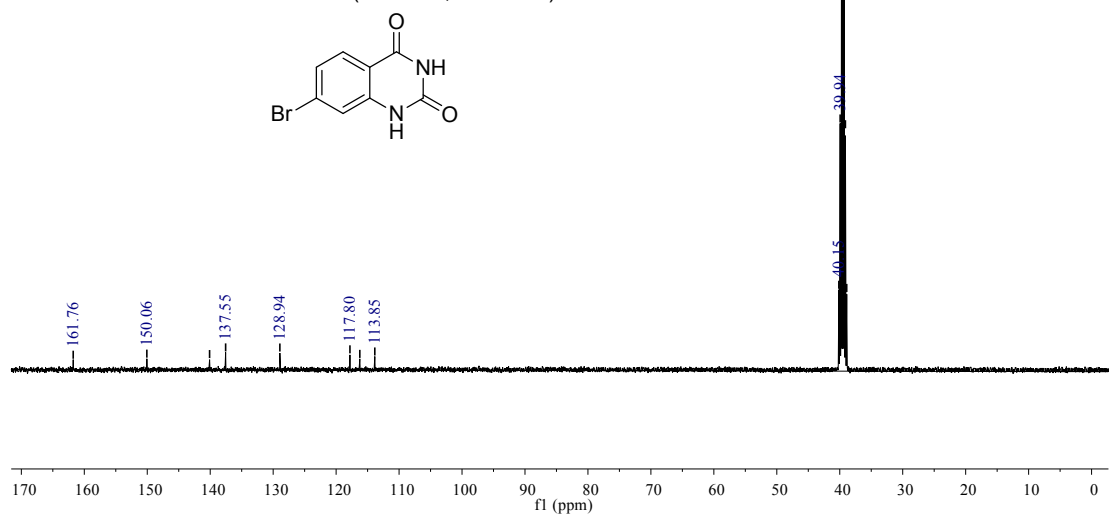

# 6-Fluoroquinoline-2,4(1H, 3H)-diones

4-17-F  
PROTON

<sup>1</sup>H NMR (400 MHz, d<sup>6</sup>-DMSO)

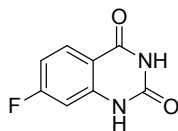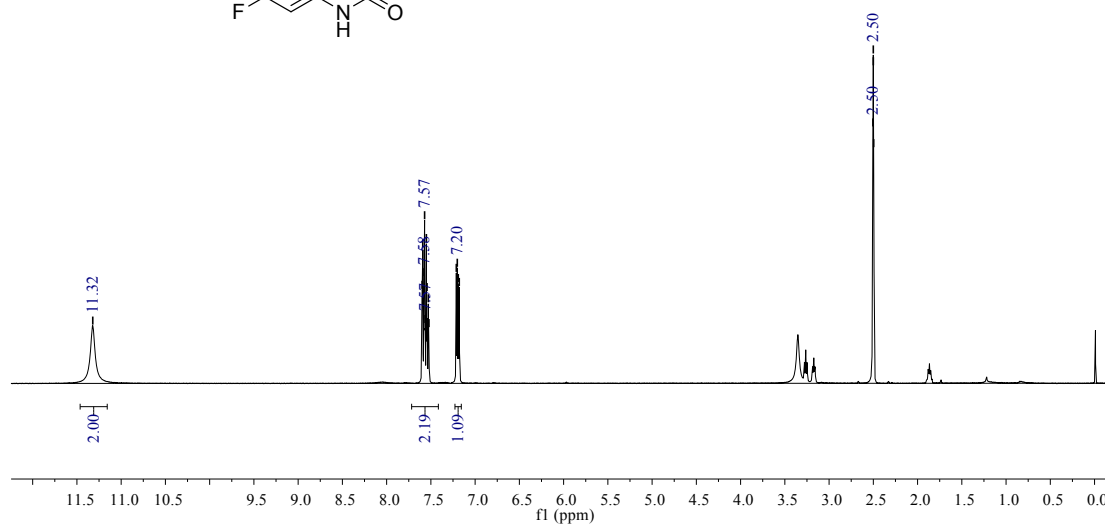

4-17-F  
C13CPD

<sup>13</sup>C NMR (100.6 MHz, d<sup>6</sup>-DMSO)

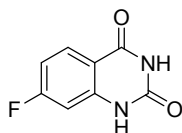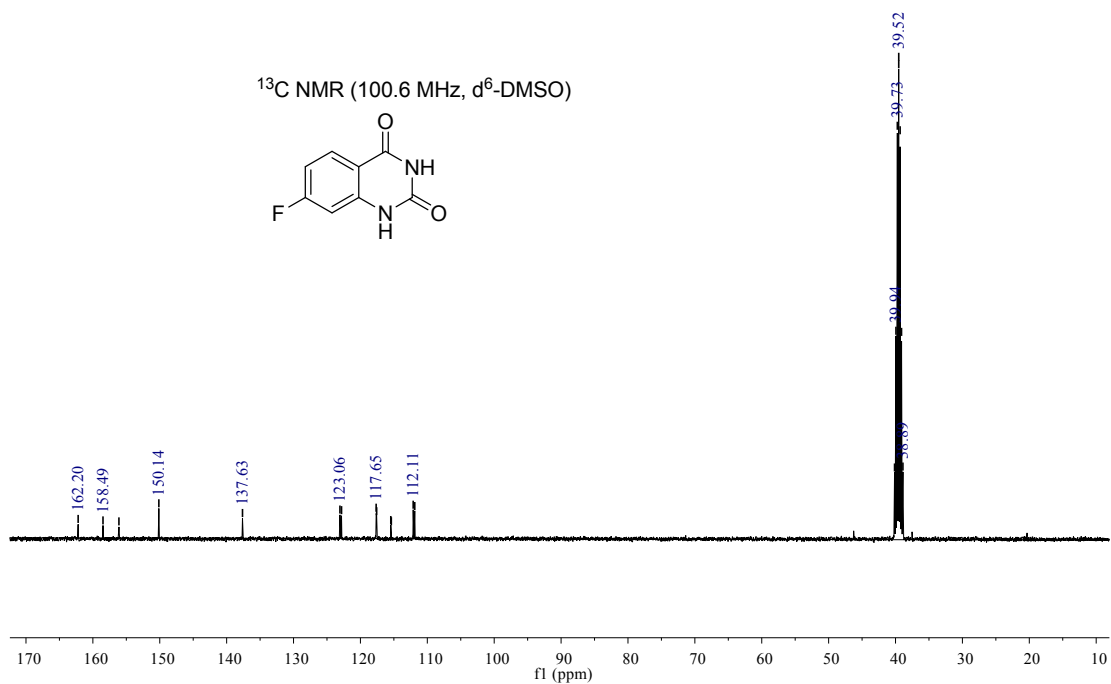

Supplement: c4ra03659j1.pdf [file c4ra03659j1.pdf]
